# Supplementary material
Source: Springer Nature journal article supplement (https://www.springermedizin.de/resource/supplementary/13023_2008_125_MOESM6_ESM.pdf/9641686)

# ETIOPATHOGENESIS OF MIXED CRYOGLOBULINEMIA

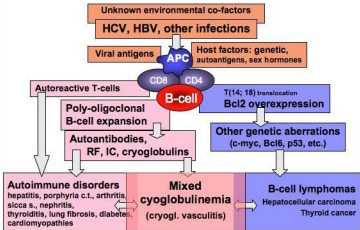

Supplement: MOESM6 [file 9641686]
